# Supplementary material for: Three-dimensional NiMoO4@CoWO4 core–shell nanorod arrays for electrochemical energy storage applications
Source: Royal Society of Chemistry journal article supplement (doi:10.1039/d3nj03846g), 2023-01-01
Supplement: d3nj03846g1.pdf [file d3nj03846g1.pdf]

## Supporting Information for

### Three-dimensional NiMoO<sub>4</sub>@CoWO<sub>4</sub> core-shell nanorod arrays for electrochemical energy storage application

Bingbing Zhang<sup>a</sup>, Kaibing Xu<sup>b</sup>, Qian Liu<sup>a,\*</sup>, Liangcai Wu<sup>a,\*</sup> and Chunrui Wang<sup>a</sup>

<sup>a</sup> Department of Physics, Donghua University, Shanghai 201620, China.

<sup>b</sup> Research Center for Analysis and Measurement, Donghua University, Shanghai, 201620, China.

\*Corresponding author

E-mail: qianliu@dhu.edu.cn; lewu@dhu.edu.cn

Address: 2999 Renmin North Road, Donghua University, Songjiang, Shanghai, China

**Table S1:** Comparison of the capacity results of NiMoO<sub>4</sub>@CoWO<sub>4</sub>, NiMoO<sub>4</sub> and CoWO<sub>4</sub>

| Samples                                   | 5 mA<br>cm <sup>-2</sup> | 6 mA<br>cm <sup>-2</sup> | 7 mA<br>cm <sup>-2</sup> | 8 mA<br>cm <sup>-2</sup> | 9 mA<br>cm <sup>-2</sup> | 10<br>mA<br>cm <sup>-2</sup> | 20<br>mA<br>cm <sup>-2</sup> | 30 mA<br>cm <sup>-2</sup> |
|-------------------------------------------|--------------------------|--------------------------|--------------------------|--------------------------|--------------------------|------------------------------|------------------------------|---------------------------|
| NiMoO <sub>4</sub> @<br>CoWO <sub>4</sub> | 0.61                     | 0.60                     | 0.58                     | 0.56                     | 0.55                     | 0.53                         | 0.42                         | 0.35                      |
| NiMoO <sub>4</sub>                        | 0.40                     | 0.35                     | 0.32                     | 0.29                     | 0.27                     | 0.25                         | 0.19                         | 0.16                      |
| CoWO <sub>4</sub>                         | 0.18                     | 0.17                     | 0.16                     | 0.15                     | 0.14                     | 0.13                         | 0.11                         | 0.10                      |

**Table S2:** Summary of EIS data fitted

| Samples | R <sub>s</sub> (ohm) | R <sub>ct</sub> (ohm) | W |
|---------|----------------------|-----------------------|---|
|---------|----------------------|-----------------------|---|

|                                                |      |      |      |
|------------------------------------------------|------|------|------|
| <b>NiMoO<sub>4</sub>@<br/>CoWO<sub>4</sub></b> | 0.63 | 1.15 | 0.11 |
| <b>NiMoO<sub>4</sub></b>                       | 1.62 | 0.55 | 5.61 |
| <b>CoWO<sub>4</sub></b>                        | 1.76 | 1.02 | 19.2 |

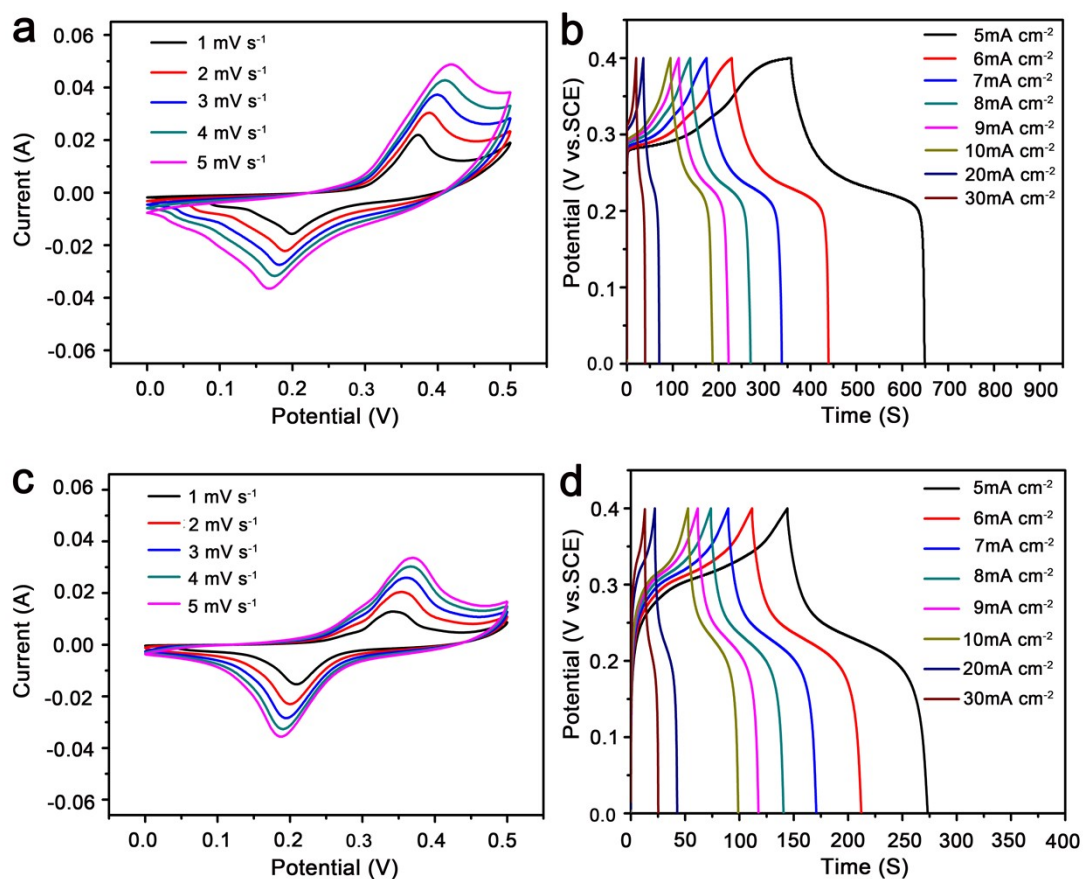

**Fig. S1.** (a) CV curves of the NiMoO<sub>4</sub> electrode at various scan rates. (b) CD curves of the NiMoO<sub>4</sub> electrode at different current densities. (c) CV curves of the CoWO<sub>4</sub> electrode at various scan rates. (d) CD curves of the CoWO<sub>4</sub> electrode at different current densities.

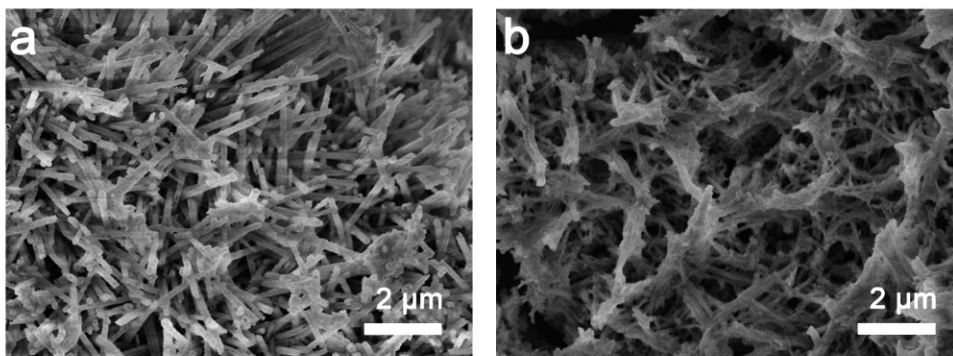

**Fig. S2** (a) SEM images of NiMoO<sub>4</sub>@CoWO<sub>4</sub> after long cycle. (b) SEM images of NiMoO<sub>4</sub> after long cycle.

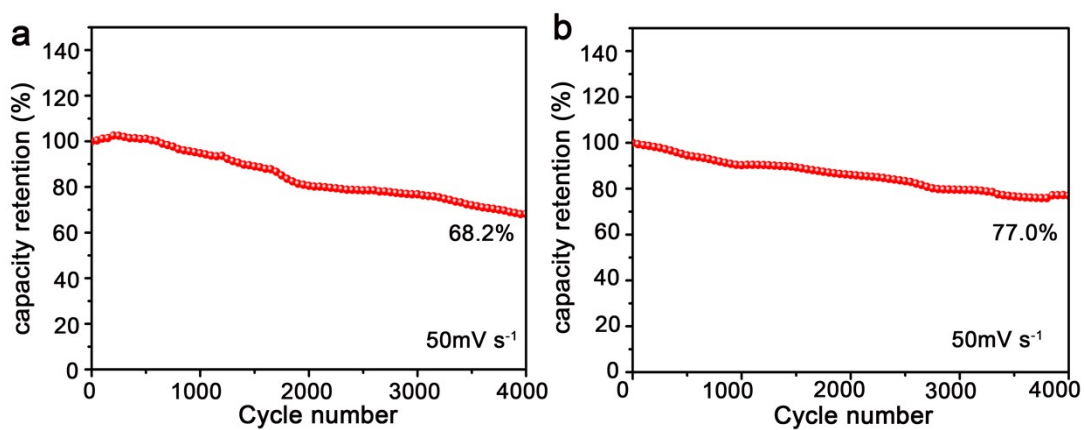

**Fig. S3** (a) Cycling performance of the NiMoO<sub>4</sub> electrode at 50 mV s<sup>-1</sup>. (b) Cycling performance of the CoWO<sub>4</sub> electrode at 50 mV s<sup>-1</sup>.

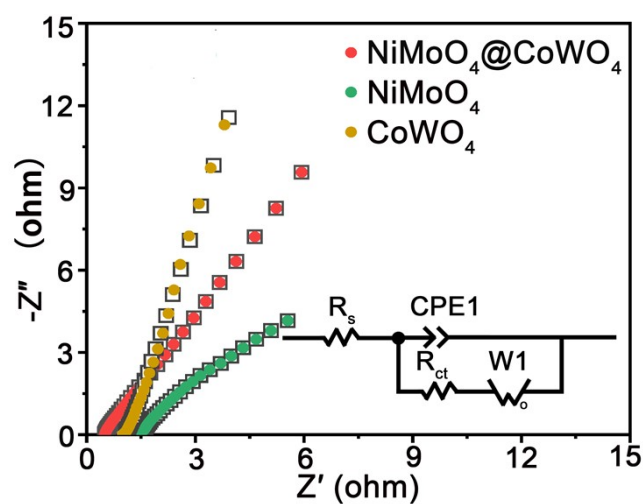

**Fig. S4** Nyquist plots and the fitting results of the as-prepared composites.

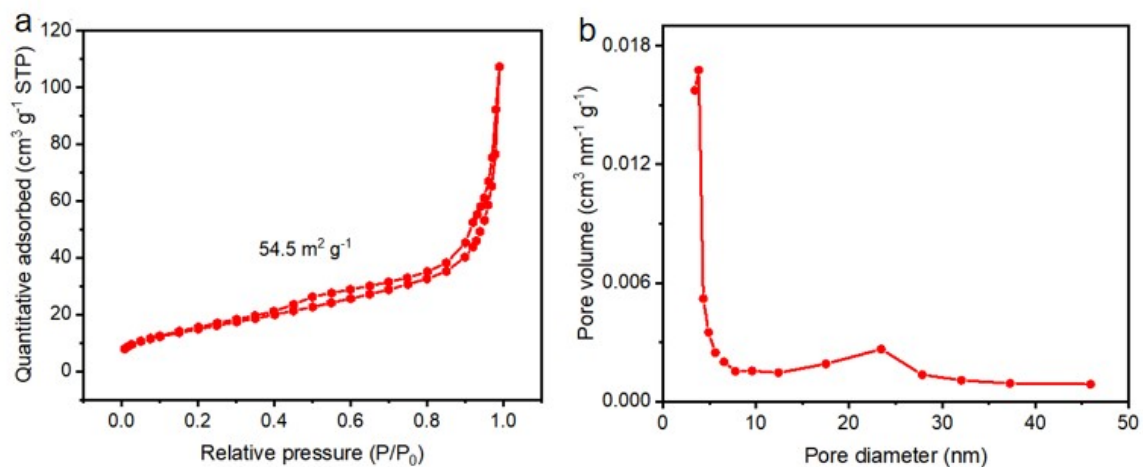

**Fig. S5** (a)  $\text{N}_2$  adsorption/desorption isotherm and (b) pore-size distribution curve of the  $\text{NiMoO}_4@ \text{CoWO}_4$  sample.
